# Supplementary material for: Inhibitory Activities of Alkyl Syringates and Related Compounds on Aflatoxin Production
Source: MDPI journal article supplement (doi:10.3390/toxins8060177), 2016-06-07
Supplement: s1 [file s1]

# Supplementary Materials: Inhibitory Activities of Alkyl Syringates and Related Compounds on Aflatoxin Production

Tomohiro Furukawa, Kurin Iimura, Taichi Kimura, Toshiyoshi Yamamoto and Shohei Sakuda

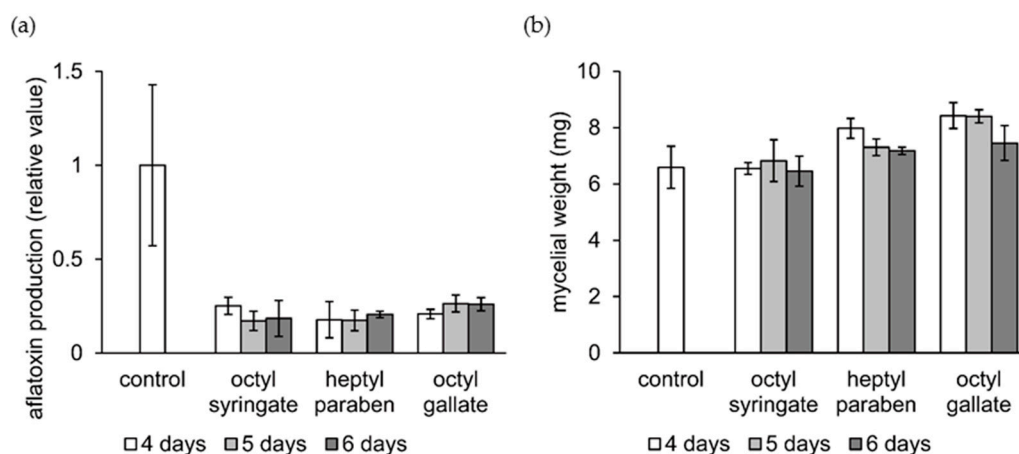

**Figure S1.** Effects of 0.05 mM of octyl syringate (8), heptyl paraben (11) and octyl gallate (14) on aflatoxin production (a) and mycelial weight (b) of *A. flavus* after four, five, six days of cultivation.  $n = 4$ .

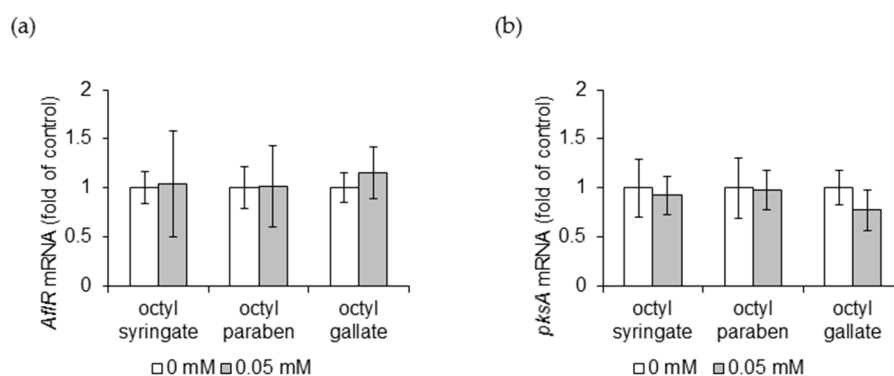

**Figure S2.** Effects of 0.05 mM of octyl syringate (8), octyl paraben (12) and octyl gallate (14) on *aflR* (a) and *pksA* (b) mRNA level of *A. flavus*.  $n = 6$ .
